# Supplementary material
Source: PubMed Central journal article supplement (PMC4496596)
Supplement: IAI.00302-15_zii999091334so1.pdf [file IAI.00302-15_zii999091334so1.pdf]

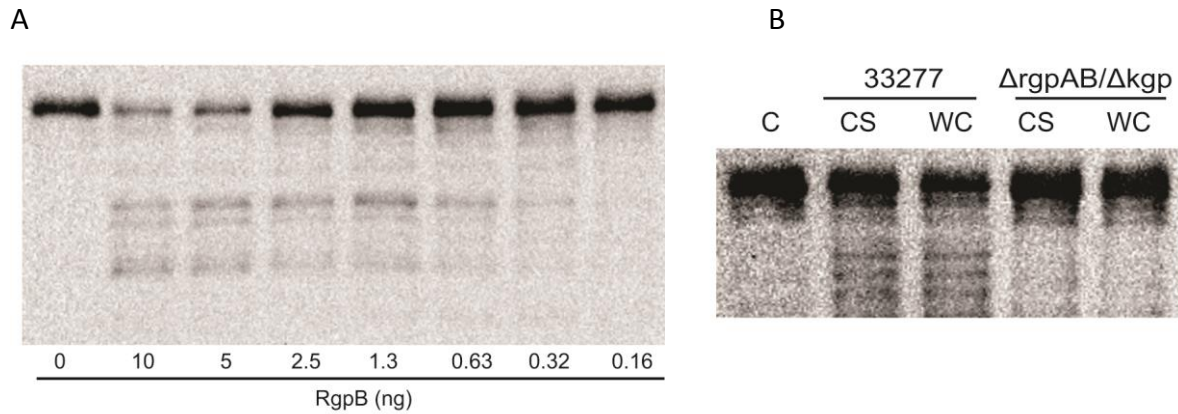

Figure S1. RgpB and *P. gingivalis* culture supernatants can degrade  $\beta$ -catenin. A. RgpB at the amount indicated was reacted with  $\beta$ -catenin (50 ng) for 10 min in PBS. Mixtures were analyzed by western blotting with  $\beta$ -catenin antibodies. Image is representative of 3 biological replicates. B. Mid logarithmic cultures of *P. gingivalis* 33277 or  $\Delta$ rgpAB/ $\Delta$ kgp (WC) were harvested from 10 ml of medium by centrifugation and cells washed in PBS. The culture supernatant (CS) was filtered (0.45  $\mu$ m). WC ( $1 \times 10^5$ ) or CS (1 ml) were reacted with  $\beta$ -catenin (50 ng) for 10 min. WC were removed by centrifugation and  $\beta$ -catenin examined by western blotting with specific antibodies. Control (C)  $\beta$ -catenin was held in buffer for 10 min. Image is representative of 3 biological replicates.
